# Supplementary material for: Electrospun ZIF-based hierarchical carbon fiber as an efficient electrocatalyst for the oxygen reduction reaction
Source: Royal Society of Chemistry journal article supplement (doi:10.1039/c6ta09193h), 2016-12-01
Supplement: c6ta09193h1.pdf [file c6ta09193h1.pdf]

## Electronic Supplementary Information

### **Electrospun ZIF-based hierarchical carbon fiber as efficient electrocatalyst for oxygen reduction reaction**

Chao Liu, Jing Wang, Jiansheng Li\*, Chaohai Wang, Xiuyun Sun, Jinyou Shen, Weiqing Han,  
Lianjun Wang\*

C. Liu, J. Wang, Prof. J. S. Li, J. Z. Liu, C. H. Wang, X. Y. Sun, J. Y. Shen, W. Q. Han, Prof.  
L. J. Wang

Jiangsu Key Laboratory of Chemical Pollution Control and Resources Reuse

School of Environmental and Biological Engineering

Nanjing University of Science and Technology

Nanjing 210094, P.R. China

Tel: +(86) 025-84315351

\*E-mail: lijsh@mail.njust.edu.cn; wanglj@mail.njust.edu.cn

Dr. J. Z. Liu

Herbert Gleiter Institute of Nanoscience

Nanjing University of Science and Technology

Nanjing 210094, P.R. China

## Experimental Section

**Materials:** Polyacrylonitrile (PAN, molecular weight=150000), 2-methylimidazole was obtained from Sigma-Aldrich. N,N-dimethylformamide (DMF,  $\geq 99.9\%$ ), methanol were purchased from Sinopharm Chemical Reagent Co., Ltd. Cobaltous nitrate hexahydrate ( $\text{Co}(\text{NO}_3)_2 \cdot 6\text{H}_2\text{O}$ ), Zinc nitrate hexahydrate ( $\text{Zn}(\text{NO}_3)_2 \cdot 6\text{H}_2\text{O}$ ) and sulfuric acid was purchased from Nanjing Chemical Reagent Co., Ltd. All chemicals were used as received without any further purification. Millipore water was used in all experiments.

**Synthesis of Zn,Co-ZIF:** Zn,Co-ZIF were synthesized by a reported method<sup>[1]</sup>. The typical preparation of Zn,Co-ZIF was described by the following procedure.  $\text{Co}(\text{NO}_3)_2 \cdot 6\text{H}_2\text{O}$  (1.57 g) and  $\text{Zn}(\text{NO}_3)_2 \cdot 6\text{H}_2\text{O}$  (8 g) were dissolved in 500 mL of methanol. 2-methylimidazole (11 g) was dissolved separately in 400 mL of methanol. The metal salt solution was then poured into the 2-methylimidazole solution, and the resulting solution was stirred for 2 h. The solid Zn,Co-ZIF product was collected by centrifugation and washed with methanol.

**Synthesis of ZCP-CFs:** In a typical synthesis, 0.5 g of Zn,Co-ZIF was added into 5 mL DMF with sonication until the Zn,Co-ZIF were well dispersed. Then, 0.5 g PAN and 0.25 g  $\text{Co}(\text{NO}_3)_2 \cdot 6\text{H}_2\text{O}$  were added into the solution with stirring at 60 °C for 6h. The obtained Zn,Co-ZIF/ $\text{Co}^{2+}$ /PAN/DMF solution was used as a precursor for electrospinning of carbon fibers. During the electrospinning process, the precursor solution was transported to a metal needle with a flow rate of 5  $\mu\text{L min}^{-1}$  by a syringe pump. A flat copper foil used as a fiber collector was put about 12 cm away under the needle. A positive direct current (DC) voltage of about 12-15 kV was applied between the needle and the collector to generate a stable continuous Zn,Co-ZIF/ $\text{Co}^{2+}$ /PAN-based fibers, which were denoted as ZCPF. The electrospun fibers were collected on an aluminum foil wrapped on the metal drum with a rotation speed of 300 rpm. The obtained fibers were pre-oxidized in an air atmosphere at 240 °C for 1 h (denoted as ZCPF-PO) and then carbonized at 700-1000 °C for 3 h in argon. The resultant Co-N doped composite

fibers were denoted as ZCPF-C. Finally, the unstable Co species were leached out in 1M H<sub>2</sub>SO<sub>4</sub> solution and the obtained product was ZCP-CFs-T (T is the pyrolysis temperature). For comparison, Zn,Co-ZIF was directly carbonized into granular porous carbon (denoted as ZIF-C) at 900 °C followed by the acid etching process. Co<sup>2+</sup>/PAN fibers were prepared without adding HMCSSs in the precursor solution. Through the similar process, Co, N-doped carbon fibers (CP-CFs) were synthesized.

[1] L. Shang, H. J. Y, X. Huang, T. Bian, R. Shi, Y. F. Zhao, G. I. N. Waterhouse, L. Z. Wu, C. H. Tung and T. R. Zhang, *Adv. Mater.*, 2016, 28, 1668.

**Characterization:** TEM (transmission electron microscopy) analysis was conducted on an FEI Titan G2 60-300 transmission electron microscopy (TEM) operated at an accelerating voltage of 300 kV at Nanjing University of Science and Technology. It is equipped with a spherical aberration corrector under the objective lens, which allows for an information limit better than 0.08 nm. For imaging, it equipped with a Gatan Orius SC 1000B CCD (Charge Coupled Device) camera. SEM (scanning electron microscopy) analysis was conducted on FEI 250 system. The XPS (X-ray photoelectron spectroscopy) spectra were obtained by using a PHI Quantera II ESCA System with Al K $\alpha$  radiation at 1486.8V. N<sub>2</sub> adsorption and desorption isotherms were measured using Micromeritics ASAP-2020 at liquid nitrogen temperature (-196 °C). The specific surface area and the pore size distribution were calculated by using the Brunauer-Emmett-Teller (BET) and Barrett-Joyner-Halenda (BJH) method, respectively. The X-ray diffraction (XRD) patterns were recorded on a Bruker AXS D8 advance powder diffraction system using Cu K $\alpha$  ( $\lambda=1.5418\text{\AA}$ ) radiation. Raman spectra were collected on Renishaw in Via reflex spectrometer system.

**Electrochemical measurements:** Electrochemical measurements were conducted using a computer-controlled potentiostat (CHI 760C, CH Instrument, Shanghai) with a three-electrode electrochemical cell. The standard three-electrode electrochemical cell was fabricated using a catalysts-modified glassy carbon as the working electrode, platinum wire as the counter

electrode, and Ag/AgCl as the reference electrode. The working electrodes were fabricated as follows: first, 10 mg of the as-synthesized samples was mixed with 1 mL of DI water/isopropanol (1:1). The obtained suspension (10  $\mu$ L) was dropped onto a rotating disk electrode (RDE, 5 mm diameter, 0.196 cm<sup>2</sup> geometric surface areas). Through measurement, the loading mass of carbon spheres was 0.255 mg cm<sup>-2</sup>. After drying, a Nafion solution (0.5 wt % in isopropanol) was coated on the sample as the binder. The cyclic voltammetry (CV) tests of the samples in O<sub>2</sub>-saturated 0.1 M aqueous KOH solutions were performed in the potential range of 0.2 to -1.0 V with a scan rate of 10 mV s<sup>-1</sup>. Linear sweep voltammograms (LSV) were acquired through the rotating disk electrode (RDE) technique in O<sub>2</sub>-saturated 0.1 M KOH at a scan rate of 10 mV s<sup>-1</sup> from 0.2 to -1.0 V under various rotation speeds (225-2500 rpm). The stability test was tested at the potential that the ORR limiting current was trended to be reached. Therefore, the stability test was performed at a potential of -0.26 V in O<sub>2</sub>-saturated 0.1 M KOH solution for the chronoamperometry at room temperature with the working electrode rotating at 1600 rpm.

The electron transfer number (*n*) was calculated from the Koutecky-Levich (K-L) equation:

$$\frac{1}{j} = \frac{1}{j_k} + \frac{1}{B \omega^{1/2}}$$

$$n = \frac{B}{0.2F(DO_2)^{2/3} (\nu)^{-1/6} C_{O_2}}$$

$$j_k = nFkC_0$$

Where  $j_k$  is the kinetic current, *B* can be determined from the slope of the K-L plots. *F* is the Faraday constant ( $F=96485$  C mol<sup>-1</sup>),  $D_{O_2}$  is the diffusion coefficient of O<sub>2</sub> ( $1.9 \times 10^{-5}$  cm<sup>2</sup> s<sup>-1</sup>),  $\nu$  is the kinetic viscosity of the electrolyte ( $\nu = 0.01$  cm<sup>2</sup> s<sup>-1</sup>) and  $C_{O_2}$  is the bulk concentration of O<sub>2</sub> ( $1.2 \times 10^{-6}$  mol cm<sup>-3</sup>), *n* is the overall number of electrons gained per O<sub>2</sub>, *k* is the electron transfer rate constant.

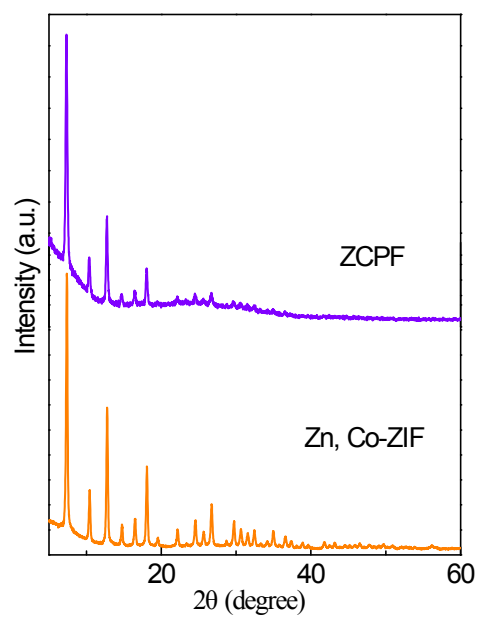

Figure S1. XRD patterns of Zn, Co-ZIF and ZCPF.

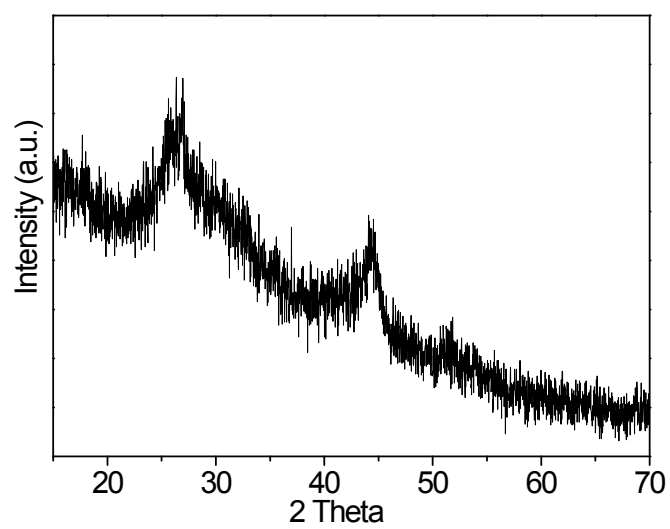

Figure S2. XRD patterns of ZCPF-C

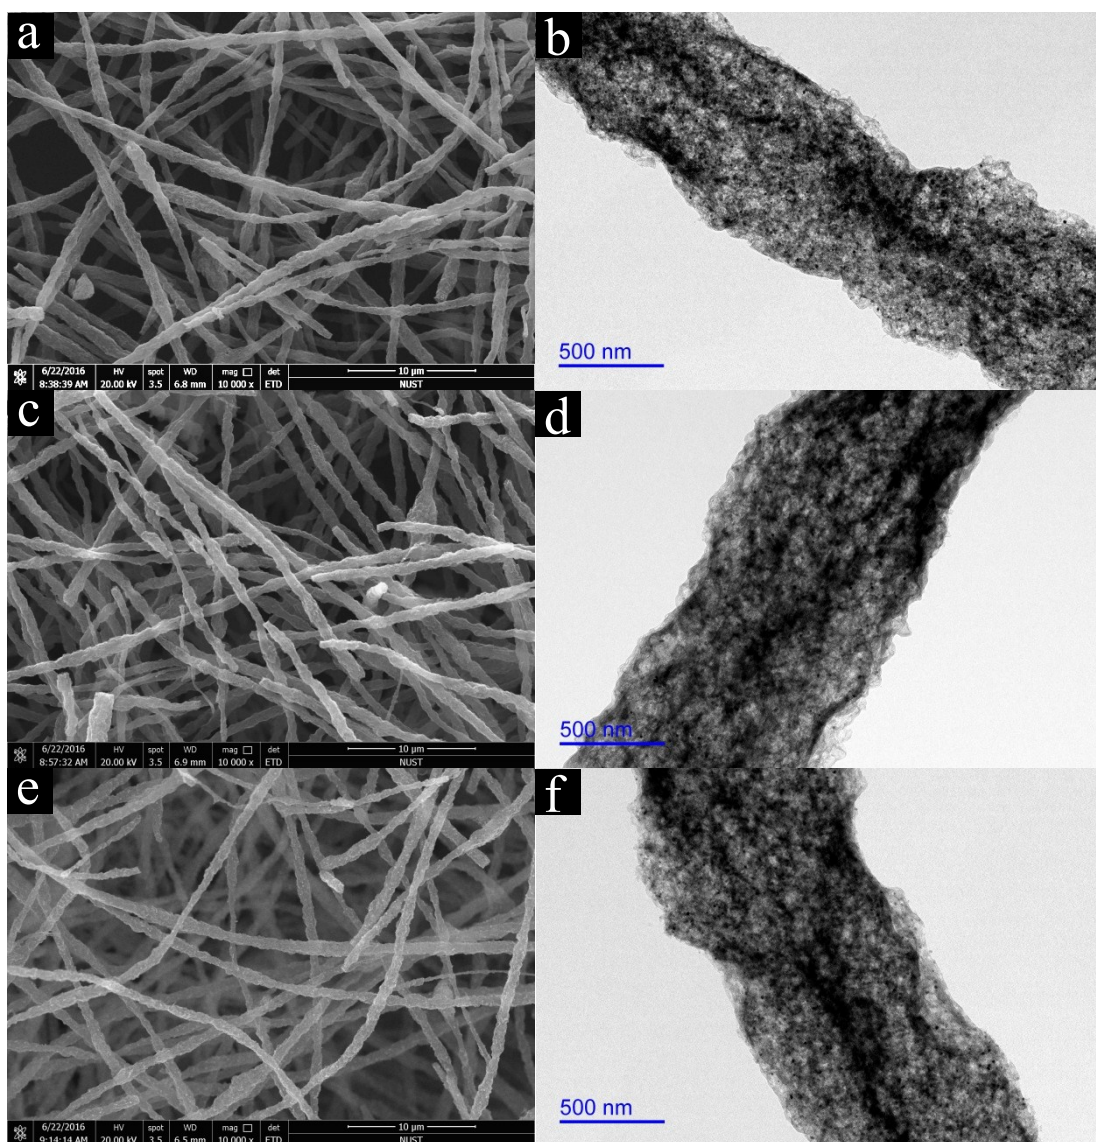

Figure S3. (a, c, e) SEM images of ZCP-CFs-7, ZCP-CFs-8, ZCP-CFs-10, (b, d, f) TEM images of ZCP-CFs-7, ZCP-CFs-8, ZCP-CFs-10.

Table S1. Textural parameters and proportion of carbon, oxide, nitrogen and iron calculated by XPS of the samples

| Samples    | BET surface area (m <sup>2</sup> g <sup>-1</sup> ) | Pore volume (cm <sup>3</sup> g <sup>-1</sup> ) | C content (%) | O content (%) | N content (%) | Co content (%) |
|------------|----------------------------------------------------|------------------------------------------------|---------------|---------------|---------------|----------------|
| ZCP-CFs-7  | 317.0                                              | 0.40                                           | 84.5          | 7.6           | 7.8           | 0.1            |
| ZCP-CFs-8  | 426.5                                              | 0.48                                           | 86.8          | 6.4           | 6.4           | 0.2            |
| ZCP-CFs-9  | 515.2                                              | 0.54                                           | 88.3          | 5.7           | 5.8           | 0.2            |
| ZCP-CFs-10 | 529.7                                              | 0.56                                           | 92.3          | 4.3           | 3.3           | 0.1            |



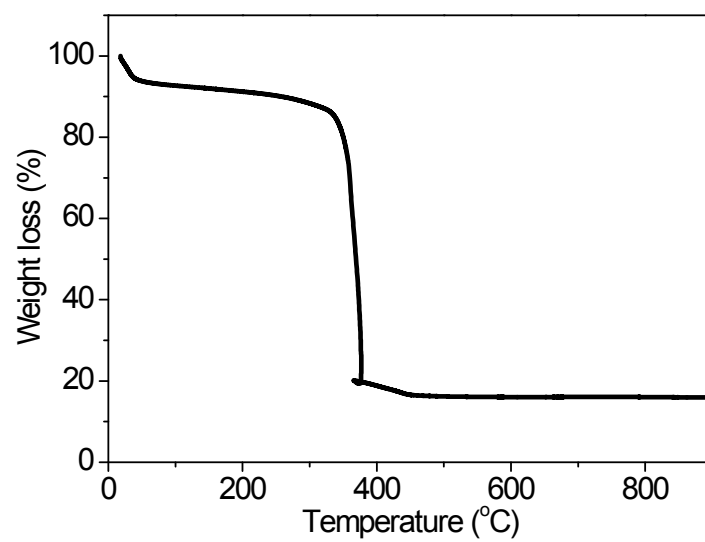

Figure S4. Figure S4. TGA curve of ZCP-CFs-9 treated in air with a heating rate 5 °C/min.

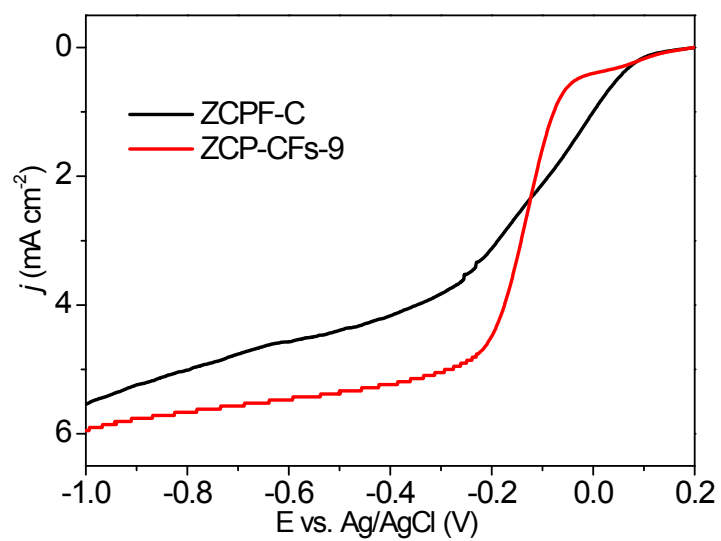

Figure S5. Polarization curves of ZCP-CFs-9 and ZCPF-C in O<sub>2</sub>-saturated 0.1 M KOH at a rotation rate of 1600 rpm

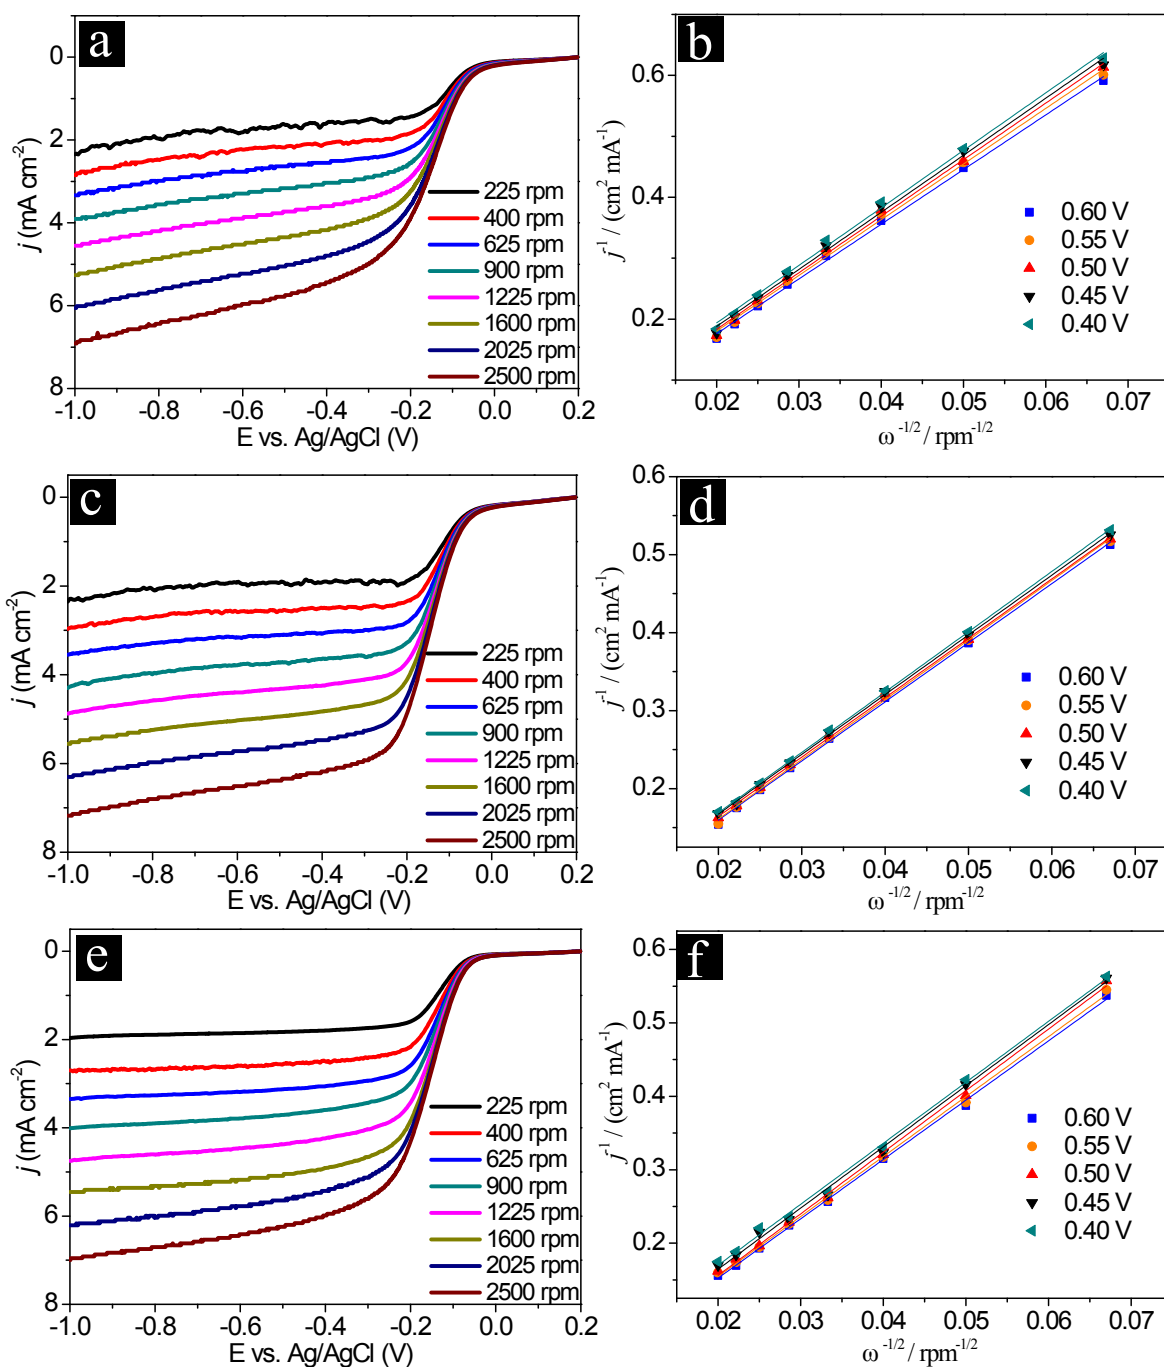

Figure S6. (a, c, e) Polarization curves of ZCP-CFs-7, 8, and 10 in O<sub>2</sub>-saturated 0.1 M KOH at different rotation rates, (b, d, f) Koutecky-Levich plots of ZCP-CFs-7, 8, and 10 derived from polarization curves in (a, c, e) at different electrode potentials.

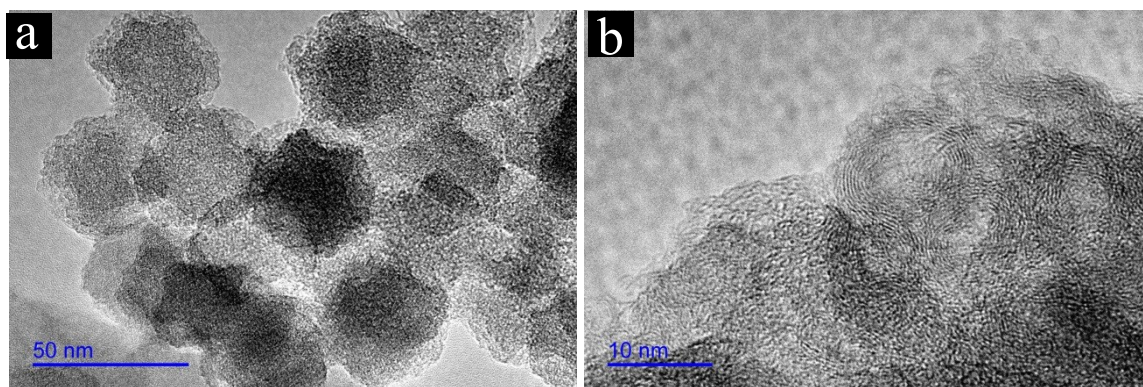

Figure S7. (a, b) TEM images of ZIF-C.

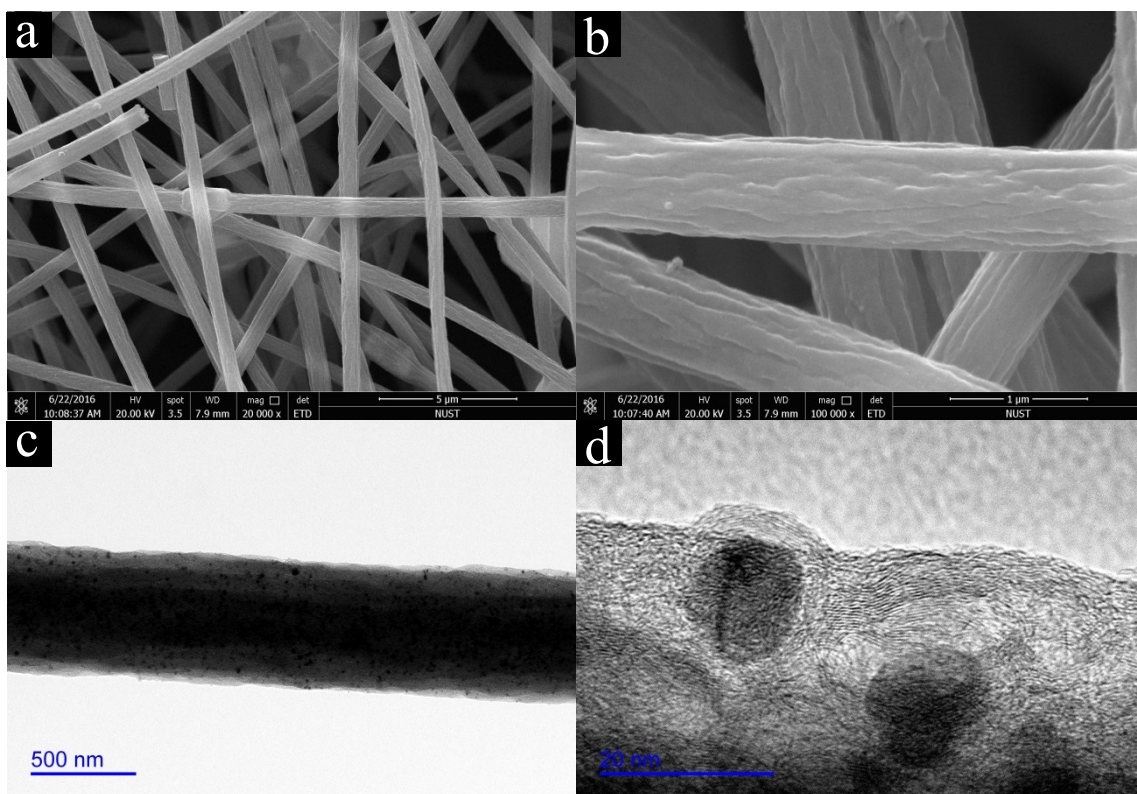

Figure S8. (a, b) SEM images, (c, d) TEM images of CP-CFs.

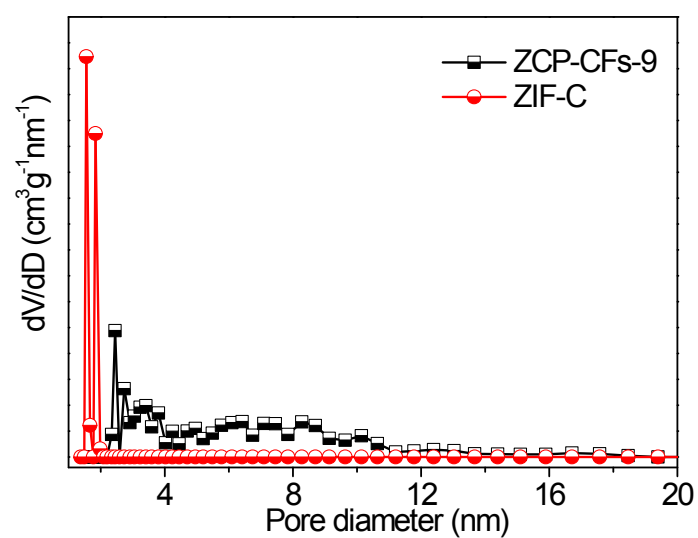

Figure S9. Pore size distribution of ZCP-CFs-9 and ZIF-C.

Table S2. Textural parameters and proportion of carbon, oxide, nitrogen and iron calculated by XPS of the samples

| Samples   | BET surface area (m <sup>2</sup> g <sup>-1</sup> ) | Pore volume (cm <sup>3</sup> g <sup>-1</sup> ) | C content (%) | O content (%) | N content (%) | Co content (%) |
|-----------|----------------------------------------------------|------------------------------------------------|---------------|---------------|---------------|----------------|
| ZIF-C     | 676.8                                              | 0.59                                           | 85.6          | 6.7           | 7.5           | 0.2            |
| CP-CFs    | 183.1                                              | 0.25                                           | 88.8          | 5.2           | 5.9           | 0.1            |
| ZCP-CFs-9 | 515.2                                              | 0.54                                           | 88.3          | 5.7           | 5.8           | 0.2            |

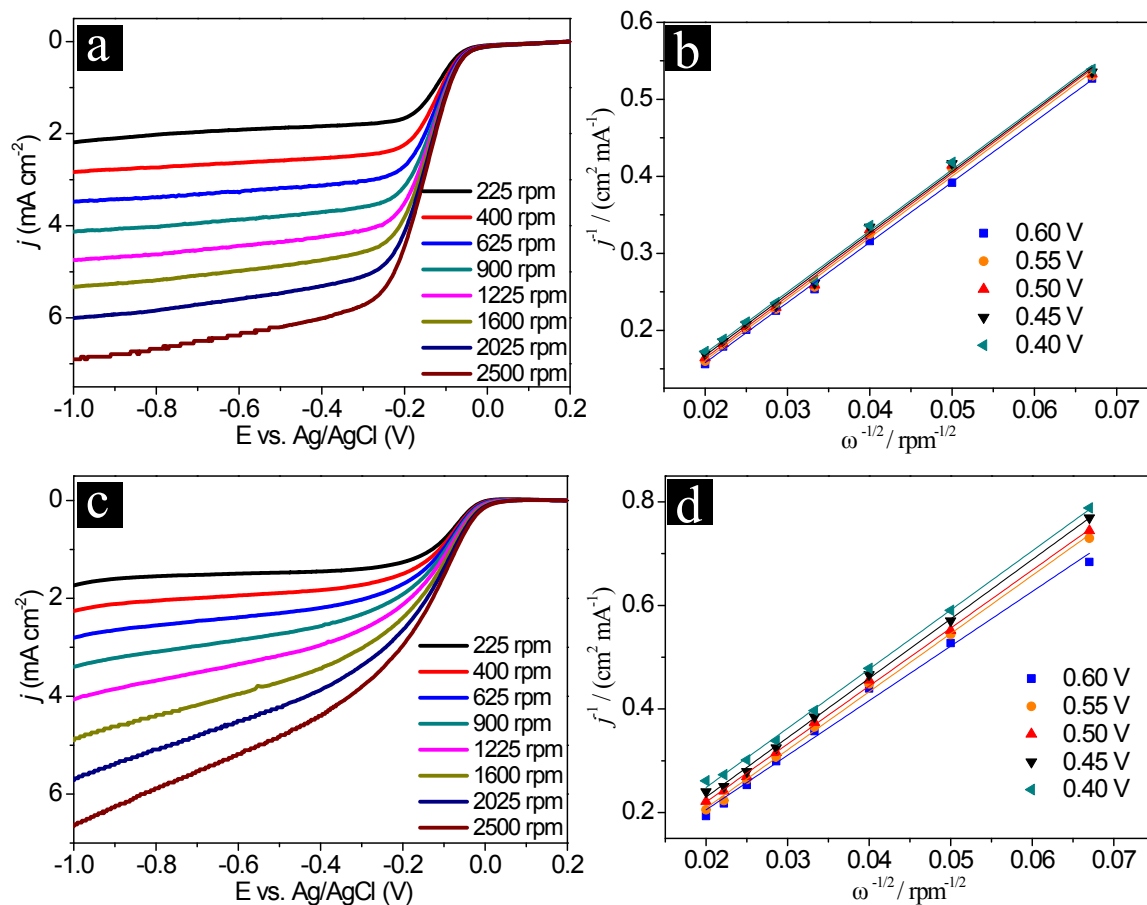

Figure S10. (a, c,) Polarization curves of ZIF-C and CP-CFs in O<sub>2</sub>-saturated 0.1 M KOH at different rotation rates, (b, d) Koutecky-Levich plots of ZIF-C and CP-CFs derived from polarization curves in (a, c) at different electrode potentials.



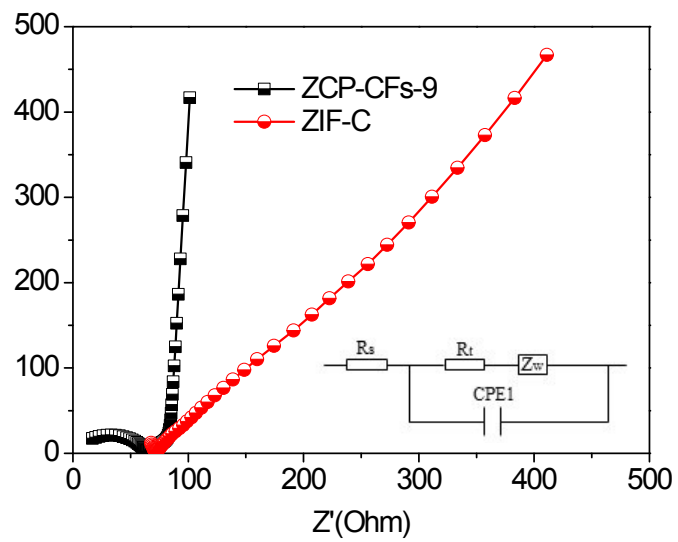

Figure S11. Electrochemical impedance spectroscopy of ZCP-CFs-9 and ZIF-C (Inset: the equivalent circuit diagram).

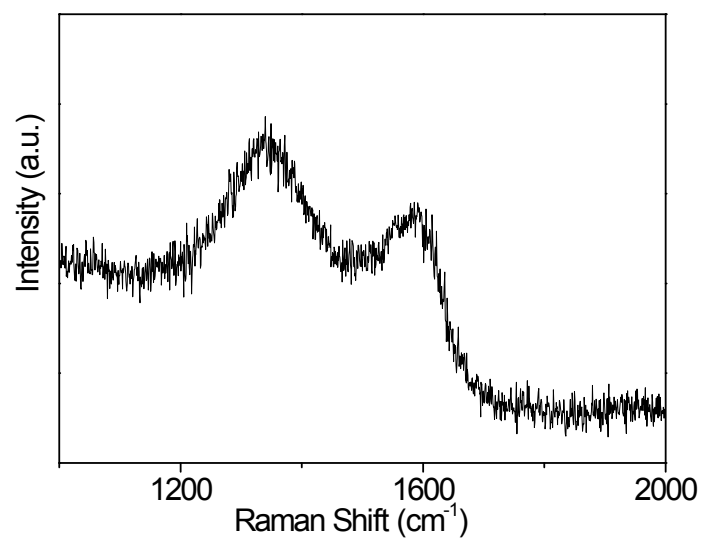

Figure S12. Raman spectrum of Pt/C.

Table S3. Comparison of ORR performance in 0.1 M KOH electrolyte of ZCP-CFs-9 with literature values.

| Materials                                 | Half-wave potential (V vs. Ag/AgCl) | Current density at -0.7 V (mA cm <sup>-2</sup> ) | References                            |
|-------------------------------------------|-------------------------------------|--------------------------------------------------|---------------------------------------|
| Fe-N-CNFs                                 | -0.140                              | -5.12                                            | Angew. Chem. Int. Ed. 2015, 54, 8179  |
| Fe-N-C                                    | 0.86 (vs. RHE)                      | -5.8                                             | Adv. Mater. 2015, 27, 2521            |
| Fe-GO                                     | <-0.40                              | -3.5                                             | Angew. Chem. Int. Ed. 2014, 53, 1415  |
| rGO/(Co <sub>2+</sub> -THPP) <sub>7</sub> | <-0.35                              | -3.2                                             | Angew. Chem. Int. Ed. 2013, 52, 5585  |
| FePc-Py-CNTs                              | 0.915 (vs. RHE)                     | -5.3                                             | Nat. Commun. 2013, 4, 2076            |
| Fe-N/C                                    | 0.809 (vs. RHE)                     | -6.0                                             | J. Am. Chem. Soc. 2014, 136, 11027    |
| Fe-N-C-700                                | -0.178                              | -4.4                                             | Chem. Eur. J. 2013, 19, 16170         |
| CoP-CMP800                                | -0.18                               | -4.6                                             | Adv. Mater. 2014, 26, 1450            |
| C-COP-P-Co                                | 0.80 (vs. RHE)                      | -5.8                                             | Angew. Chem. Int. Ed. 2014, 53, 2433  |
| Fe <sub>3</sub> C/C-800                   | 0.83 (vs. RHE)                      | /                                                | Angew. Chem. Int. Ed. 2014, 53, 3675  |
| NPC-Co45                                  | 0.79 (vs. RHE)                      | -5.5                                             | Nano Res. 2013, 6, 293                |
| Co <sub>3</sub> O <sub>4</sub> /N-rmGO    | 0.83 (vs. RHE)                      | -5.0                                             | Nat. Mater. 2011, 10, 780             |
| G-Co/CoO NPs                              | -0.176                              | -4.5                                             | Angew. Chem. Int. Ed. 2012, 51, 11770 |
| MnFe <sub>2</sub> O <sub>4</sub> /C       | -0.154                              | -5.8                                             | Nano Lett. 2013, 13, 2947             |
| Fe <sub>3</sub> O <sub>4</sub> /N-Gas     | <-0.40                              | -3.3                                             | J. Am. Chem. Soc. 2012, 134, 9082     |
| P-doped ordered mesoporous carbon         | -0.30                               | -4.3                                             | J. Am. Chem. Soc. 2012, 134, 16127    |
| ZCP-CFs-900                               | -0.135 (0.805 vs. RHE)              | -5.6                                             | This work                             |

Table S4. Comparison of economy in ZCP-CFs-9 with 20%Pt/C

| Chemicals                                            | Specifications | Price (¥) |
|------------------------------------------------------|----------------|-----------|
| Zn(NO <sub>3</sub> ) <sub>2</sub> ·6H <sub>2</sub> O | 500 g          | 76.0      |
| Co(NO <sub>3</sub> ) <sub>2</sub> ·6H <sub>2</sub> O | 100 g          | 63.0      |
| 2-methylimidazole                                    | 500 g          | 808.5     |
| methanol                                             | 500 MI         | 12.0      |
| DMF                                                  | 500 MI         | 17.0      |
| PAN                                                  | 100 g          | 2509.5    |
| ZCP-CFs                                              | 1 g            | 107.5     |
| 20% Pt/C                                             | 1 g            | 580.0     |
